# Supplementary material for: Including uncertainty of the expected mortality rates in the prediction of loss in life expectancy
Source: Springer Nature journal article supplement (doi:10.1186/s12874-023-02118-w), 2023-12-12
Supplement: MOESM1 [file 26519438]

Table S1: Point estimates (PE) with lower (LCI) and upper (UCI) 95% confidence intervals, standard errors (SE) and relative % precision (RP) of Loss in Life Expectancy (LLE), Life Expectancy for cancer patients (LE<sub>C</sub>) and their Life Expectancy if they did not have cancer (LE<sub>exp</sub>), obtained with different approaches. Results are presented for women, aged 55, 65, 75 and 85 years at breast cancer diagnosis in 1992, 1997 and 2002 years. All PEs are measured in years. RP illustrates the comparison of modelling approaches with and without uncertainty in the expected measures.

| Approach                 | Age at diagnosis | Expected Life Expectancy (LE <sub>exp</sub> ) |      | Life Expectancy for cancer patients (LE <sub>C</sub> ) |      | Loss in Life expectancy (LLE) |      |      |        |      |      |
|--------------------------|------------------|-----------------------------------------------|------|--------------------------------------------------------|------|-------------------------------|------|------|--------|------|------|
|                          |                  | PE                                            | SE   | PE                                                     | SE   | RP (%)                        | PE   | SE   | RP (%) | LCI  | UCI  |
| <b>diagnosed in 1992</b> |                  |                                               |      |                                                        |      |                               |      |      |        |      |      |
| modelled w.u.            | 55               | 29.62                                         | 0.65 | 23.84                                                  | 0.50 | 187.76                        | 5.77 | 0.25 | 46.26  | 5.28 | 6.27 |
| modelled w/o u.          | 55               | 29.62                                         |      | 23.84                                                  | 0.17 |                               | 5.77 | 0.17 |        | 5.43 | 6.11 |
| standard                 | 55               | 29.99                                         |      | 24.59                                                  | 0.18 |                               | 5.41 | 0.18 |        | 5.05 | 5.76 |
| modelled w.u.            | 65               | 20.87                                         | 0.52 | 17.04                                                  | 0.39 | 259.11                        | 3.82 | 0.18 | 69.01  | 3.46 | 4.18 |
| modelled w/o u.          | 65               | 20.87                                         |      | 17.04                                                  | 0.11 |                               | 3.82 | 0.11 |        | 3.61 | 4.03 |
| standard                 | 65               | 20.60                                         |      | 17.13                                                  | 0.11 |                               | 3.47 | 0.11 |        | 3.25 | 3.69 |
| modelled w.u.            | 75               | 13.02                                         | 0.41 | 10.26                                                  | 0.28 | 238.73                        | 2.76 | 0.17 | 97.51  | 2.43 | 3.08 |
| modelled w/o u.          | 75               | 13.02                                         |      | 10.26                                                  | 0.08 |                               | 2.76 | 0.08 |        | 2.59 | 2.92 |
| standard                 | 75               | 12.09                                         |      | 9.86                                                   | 0.08 |                               | 2.23 | 0.08 |        | 2.08 | 2.38 |
| modelled w.u.            | 85               | 6.67                                          | 0.34 | 5.32                                                   | 0.24 | 282.80                        | 1.35 | 0.13 | 108.06 | 1.09 | 1.60 |
| modelled w/o u.          | 85               | 6.67                                          |      | 5.32                                                   | 0.06 |                               | 1.35 | 0.06 |        | 1.22 | 1.47 |
| standard                 | 85               | 6.04                                          |      | 4.99                                                   | 0.06 |                               | 1.05 | 0.06 |        | 0.94 | 1.16 |
| <b>diagnosed in 1997</b> |                  |                                               |      |                                                        |      |                               |      |      |        |      |      |
| modelled w.u.            | 55               | 29.95                                         | 0.36 | 24.10                                                  | 0.31 | 76.98                         | 5.85 | 0.21 | 17.06  | 5.44 | 6.25 |
| modelled w/o u.          | 55               | 29.95                                         |      | 24.10                                                  | 0.18 |                               | 5.85 | 0.18 |        | 5.50 | 6.19 |
| standard                 | 55               | 30.41                                         |      | 24.90                                                  | 0.19 |                               | 5.51 | 0.19 |        | 5.14 | 5.88 |
| modelled w.u.            | 65               | 20.96                                         | 0.32 | 17.12                                                  | 0.26 | 135.16                        | 3.84 | 0.14 | 31.24  | 3.56 | 4.12 |
| modelled w/o u.          | 65               | 20.96                                         |      | 17.12                                                  | 0.11 |                               | 3.84 | 0.11 |        | 3.63 | 4.05 |
| standard                 | 65               | 21.01                                         |      | 17.44                                                  | 0.12 |                               | 3.57 | 0.12 |        | 3.35 | 3.80 |
| modelled w.u.            | 75               | 12.98                                         | 0.26 | 10.24                                                  | 0.19 | 134.58                        | 2.74 | 0.12 | 46.23  | 2.50 | 2.98 |
| modelled w/o u.          | 75               | 12.98                                         |      | 10.24                                                  | 0.08 |                               | 2.74 | 0.08 |        | 2.58 | 2.90 |
| standard                 | 75               | 12.53                                         |      | 10.18                                                  | 0.08 |                               | 2.35 | 0.08 |        | 2.19 | 2.52 |
| modelled w.u.            | 85               | 6.62                                          | 0.20 | 5.29                                                   | 0.15 | 146.01                        | 1.33 | 0.09 | 45.56  | 1.16 | 1.51 |
| modelled w/o u.          | 85               | 6.62                                          |      | 5.29                                                   | 0.06 |                               | 1.33 | 0.06 |        | 1.21 | 1.45 |
| standard                 | 85               | 6.18                                          |      | 5.10                                                   | 0.06 |                               | 1.09 | 0.06 |        | 0.97 | 1.20 |
| <b>diagnosed in 2002</b> |                  |                                               |      |                                                        |      |                               |      |      |        |      |      |
| modelled w.u.            | 55               | 29.71                                         | 0.40 | 23.96                                                  | 0.33 | 91.78                         | 5.75 | 0.21 | 20.73  | 5.34 | 6.15 |
| modelled w/o u.          | 55               | 29.71                                         |      | 23.96                                                  | 0.17 |                               | 5.75 | 0.17 |        | 5.41 | 6.08 |
| standard                 | 55               | 30.64                                         |      | 25.07                                                  | 0.19 |                               | 5.57 | 0.19 |        | 5.19 | 5.94 |
| modelled w.u.            | 65               | 20.54                                         | 0.35 | 16.84                                                  | 0.28 | 165.62                        | 3.70 | 0.15 | 39.52  | 3.42 | 3.98 |
| modelled w/o u.          | 65               | 20.54                                         |      | 16.84                                                  | 0.10 |                               | 3.70 | 0.10 |        | 3.50 | 3.90 |
| standard                 | 65               | 21.47                                         |      | 17.78                                                  | 0.12 |                               | 3.69 | 0.12 |        | 3.45 | 3.92 |
| modelled w.u.            | 75               | 12.53                                         | 0.30 | 9.94                                                   | 0.22 | 177.98                        | 2.59 | 0.13 | 62.33  | 2.34 | 2.84 |
| modelled w/o u.          | 75               | 12.53                                         |      | 9.94                                                   | 0.08 |                               | 2.59 | 0.08 |        | 2.44 | 2.74 |
| standard                 | 75               | 12.95                                         |      | 10.48                                                  | 0.09 |                               | 2.47 | 0.09 |        | 2.30 | 2.64 |
| modelled w.u.            | 85               | 6.32                                          | 0.25 | 5.08                                                   | 0.18 | 214.94                        | 1.24 | 0.10 | 73.06  | 1.05 | 1.43 |
| modelled w/o u.          | 85               | 6.32                                          |      | 5.08                                                   | 0.06 |                               | 1.24 | 0.06 |        | 1.13 | 1.35 |
| standard                 | 85               | 6.35                                          |      | 5.23                                                   | 0.06 |                               | 1.13 | 0.06 |        | 1.00 | 1.25 |
