# Supplementary material for: Including uncertainty of the expected mortality rates in the prediction of loss in life expectancy
Source: Springer Nature journal article supplement (doi:10.1186/s12874-023-02118-w), 2023-12-12
Supplement: MOESM2 [file 26519438]

Table S2: Point estimates (PE) with lower (LCI) and upper (UCI) 95% confidence intervals, standard errors (SE) and relative % precision (RP) of Loss in Life Expectancy (LLE), Life Expectancy for cancer patients (LE<sub>C</sub>) and their Life Expectancy if they did not have cancer (LE<sub>exp</sub>), obtained with different approaches. Results are presented for women, aged 55, 65, 75 and 85 years at colon cancer diagnosis in 1992, 1997 and 2002 years. All PEs are measured in years. RP illustrates the comparison of modelling approaches with and without uncertainty in the expected measures.

| Approach                 | Age at diagnosis | Expected Life Expectancy (LE <sub>exp</sub> ) |      |        | Life Expectancy for cancer patients (LE <sub>C</sub> ) |      |        | Loss in Life expectancy (LLE) |      |        |       |       |
|--------------------------|------------------|-----------------------------------------------|------|--------|--------------------------------------------------------|------|--------|-------------------------------|------|--------|-------|-------|
|                          |                  | PE                                            | SE   | RP (%) | PE                                                     | SE   | RP (%) | PE                            | SE   | RP (%) | LCI   | UCI   |
| <b>diagnosed in 1992</b> |                  |                                               |      |        |                                                        |      |        |                               |      |        |       |       |
| modelled w.u.            | 55               | 29.62                                         | 0.65 |        | 16.08                                                  | 0.56 | 21.73  | 13.54                         | 0.57 | 23.69  | 12.43 | 14.66 |
| modelled w/o u.          | 55               | 29.62                                         |      |        | 16.08                                                  | 0.46 |        | 13.54                         | 0.46 |        | 12.64 | 14.44 |
| standard                 | 55               | 29.99                                         |      |        | 16.59                                                  | 0.48 |        | 13.40                         | 0.48 |        | 12.47 | 14.33 |
| modelled w.u.            | 65               | 20.87                                         | 0.52 |        | 11.36                                                  | 0.32 | 52.91  | 9.51                          | 0.35 | 64.28  | 8.83  | 10.19 |
| modelled w/o u.          | 65               | 20.87                                         |      |        | 11.36                                                  | 0.21 |        | 9.51                          | 0.21 |        | 8.10  | 9.92  |
| standard                 | 65               | 20.60                                         |      |        | 11.38                                                  | 0.21 |        | 9.22                          | 0.21 |        | 8.80  | 9.64  |
| modelled w.u.            | 75               | 13.02                                         | 0.41 |        | 7.31                                                   | 0.22 | 107.25 | 5.71                          | 0.24 | 125.03 | 5.24  | 6.18  |
| modelled w/o u.          | 75               | 13.02                                         |      |        | 7.31                                                   | 0.11 |        | 5.71                          | 0.11 |        | 5.50  | 5.92  |
| standard                 | 75               | 12.09                                         |      |        | 7.04                                                   | 0.10 |        | 5.05                          | 0.10 |        | 4.85  | 5.24  |
| modelled w.u.            | 85               | 6.67                                          | 0.34 |        | 3.98                                                   | 0.19 | 156.28 | 2.69                          | 0.18 | 142.01 | 2.33  | 3.05  |
| modelled w/o u.          | 85               | 6.67                                          |      |        | 3.98                                                   | 0.08 |        | 2.69                          | 0.08 |        | 2.54  | 2.84  |
| standard                 | 85               | 6.04                                          |      |        | 3.75                                                   | 0.07 |        | 2.29                          | 0.07 |        | 2.16  | 2.43  |
| <b>diagnosed in 1997</b> |                  |                                               |      |        |                                                        |      |        |                               |      |        |       |       |
| modelled w.u.            | 55               | 29.95                                         | 0.36 |        | 16.24                                                  | 0.50 | 6.92   | 13.70                         | 0.50 | 7.83   | 12.72 | 14.68 |
| modelled w/o u.          | 55               | 29.95                                         |      |        | 16.24                                                  | 0.46 |        | 13.70                         | 0.46 |        | 12.79 | 14.61 |
| standard                 | 55               | 30.41                                         |      |        | 16.80                                                  | 0.48 |        | 13.61                         | 0.48 |        | 12.66 | 14.56 |
| modelled w.u.            | 65               | 20.96                                         | 0.32 |        | 11.41                                                  | 0.26 | 22.80  | 9.56                          | 0.27 | 28.59  | 9.02  | 10.09 |
| modelled w/o u.          | 65               | 20.96                                         |      |        | 11.41                                                  | 0.21 |        | 9.56                          | 0.21 |        | 9.14  | 9.97  |
| standard                 | 65               | 21.01                                         |      |        | 11.58                                                  | 0.22 |        | 9.43                          | 0.22 |        | 9.00  | 9.86  |
| modelled w.u.            | 75               | 12.98                                         | 0.26 |        | 7.29                                                   | 0.16 | 54.64  | 5.69                          | 0.17 | 63.30  | 5.35  | 6.03  |
| modelled w/o u.          | 75               | 12.98                                         |      |        | 7.29                                                   | 0.11 |        | 5.69                          | 0.11 |        | 5.48  | 5.90  |
| standard                 | 75               | 12.53                                         |      |        | 7.27                                                   | 0.11 |        | 5.26                          | 0.11 |        | 5.06  | 5.47  |
| modelled w.u.            | 85               | 6.62                                          | 0.20 |        | 3.95                                                   | 0.13 | 73.54  | 2.67                          | 0.12 | 64.24  | 2.43  | 2.91  |
| modelled w/o u.          | 85               | 6.62                                          |      |        | 3.95                                                   | 0.08 |        | 2.67                          | 0.08 |        | 2.52  | 2.81  |
| standard                 | 85               | 6.18                                          |      |        | 3.83                                                   | 0.07 |        | 2.35                          | 0.07 |        | 2.21  | 2.49  |
| <b>diagnosed in 2002</b> |                  |                                               |      |        |                                                        |      |        |                               |      |        |       |       |
| modelled w.u.            | 55               | 29.71                                         | 0.40 |        | 16.14                                                  | 0.50 | 8.33   | 13.57                         | 0.50 | 9.38   | 12.59 | 14.56 |
| modelled w/o u.          | 55               | 29.71                                         |      |        | 16.14                                                  | 0.46 |        | 13.57                         | 0.46 |        | 12.67 | 14.47 |
| standard                 | 55               | 30.64                                         |      |        | 16.92                                                  | 0.49 |        | 13.72                         | 0.49 |        | 12.77 | 14.68 |
| modelled w.u.            | 65               | 20.54                                         | 0.35 |        | 11.22                                                  | 0.27 | 28.34  | 9.32                          | 0.28 | 35.23  | 8.77  | 9.87  |
| modelled w/o u.          | 65               | 20.54                                         |      |        | 11.22                                                  | 0.21 |        | 9.32                          | 0.21 |        | 8.92  | 9.73  |
| standard                 | 65               | 21.47                                         |      |        | 11.81                                                  | 0.23 |        | 9.66                          | 0.23 |        | 9.22  | 10.11 |
| modelled w.u.            | 75               | 12.53                                         | 0.30 |        | 7.07                                                   | 0.18 | 73.39  | 5.45                          | 0.19 | 83.49  | 5.09  | 5.82  |
| modelled w/o u.          | 75               | 12.53                                         |      |        | 7.07                                                   | 0.10 |        | 5.45                          | 0.10 |        | 5.25  | 5.65  |
| standard                 | 75               | 12.95                                         |      |        | 7.48                                                   | 0.11 |        | 5.47                          | 0.11 |        | 5.25  | 5.68  |
| modelled w.u.            | 85               | 6.32                                          | 0.25 |        | 3.79                                                   | 0.15 | 112.02 | 2.53                          | 0.14 | 99.23  | 2.25  | 2.80  |
| modelled w/o u.          | 85               | 6.32                                          |      |        | 3.79                                                   | 0.07 |        | 2.53                          | 0.07 |        | 2.39  | 2.66  |
| standard                 | 85               | 6.35                                          |      |        | 3.93                                                   | 0.07 |        | 2.43                          | 0.07 |        | 2.28  | 2.57  |
