# Supplementary material for: Including uncertainty of the expected mortality rates in the prediction of loss in life expectancy
Source: Springer Nature journal article supplement (doi:10.1186/s12874-023-02118-w), 2023-12-12
Supplement: MOESM3 [file 26519438]

Table S3: Point estimates (PE) with lower (LCI) and upper (UCI) 95% confidence intervals, standard errors (SE) and relative % precision (RP) of an expected 15-year restricted mean survival time (15-year RMST<sub>exp</sub>), observed 15-year restricted mean survival time (15-year RMST<sub>C</sub>) and loss in 15-year restricted mean survival time (15-year LRMST), obtained with different approaches. Results are presented for women, aged 55, 65, 75 and 85 years at breast cancer diagnosis in 1992, 1997 and 2002 years. All PEs are measured in years. RP illustrates the comparison of modelling approaches with and without uncertainty in the expected measures.

| Approach                 | Age at diagnosis | Expected 15-year RMST <sub>exp</sub> |      |        | Observed 15-year RMST <sub>C</sub> |      |        | Loss in 15-year restricted mean survival time (LRMST) |      |        |      |      |
|--------------------------|------------------|--------------------------------------|------|--------|------------------------------------|------|--------|-------------------------------------------------------|------|--------|------|------|
|                          |                  | PE                                   | SE   | RP (%) | PE                                 | SE   | RP (%) | PE                                                    | SE   | RP (%) | LCI  | UCI  |
| <b>diagnosed in 1992</b> |                  |                                      |      |        |                                    |      |        |                                                       |      |        |      |      |
| modelled w.u.            | 55               | 14.43                                | 0.11 |        | 12.80                              | 0.10 | 149.64 | 1.63                                                  | 0.04 | 7.42   | 1.54 | 1.71 |
| modelled w/o u.          | 55               | 14.43                                |      |        | 12.80                              | 0.04 |        | 1.63                                                  | 0.04 |        | 1.55 | 1.71 |
| standard                 | 55               | 14.37                                |      |        | 12.86                              | 0.04 |        | 1.51                                                  | 0.04 |        | 1.43 | 1.59 |
| modelled w.u.            | 65               | 13.57                                | 0.15 |        | 11.88                              | 0.13 | 207.35 | 1.70                                                  | 0.05 | 15.76  | 1.60 | 1.79 |
| modelled w/o u.          | 65               | 13.57                                |      |        | 11.88                              | 0.04 |        | 1.70                                                  | 0.04 |        | 1.61 | 1.78 |
| standard                 | 65               | 13.41                                |      |        | 11.84                              | 0.04 |        | 1.57                                                  | 0.04 |        | 1.48 | 1.65 |
| modelled w.u.            | 75               | 11.25                                | 0.23 |        | 9.22                               | 0.18 | 193.16 | 2.03                                                  | 0.08 | 35.37  | 1.87 | 2.20 |
| modelled w/o u.          | 75               | 11.25                                |      |        | 9.22                               | 0.06 |        | 2.03                                                  | 0.06 |        | 1.91 | 2.15 |
| standard                 | 75               | 10.62                                |      |        | 8.88                               | 0.06 |        | 1.74                                                  | 0.06 |        | 1.62 | 1.85 |
| modelled w.u.            | 85               | 6.59                                 | 0.31 |        | 5.28                               | 0.22 | 269.07 | 1.31                                                  | 0.11 | 85.79  | 1.08 | 1.53 |
| modelled w/o u.          | 85               | 6.59                                 |      |        | 5.28                               | 0.06 |        | 1.31                                                  | 0.06 |        | 1.19 | 1.43 |
| standard                 | 85               | 5.96                                 |      |        | 4.94                               | 0.06 |        | 1.02                                                  | 0.06 |        | 0.91 | 1.13 |
| <b>diagnosed in 1997</b> |                  |                                      |      |        |                                    |      |        |                                                       |      |        |      |      |
| modelled w.u.            | 55               | 14.53                                | 0.05 |        | 12.89                              | 0.06 | 47.28  | 1.64                                                  | 0.04 | 1.71   | 1.56 | 1.72 |
| modelled w/o u.          | 55               | 14.53                                |      |        | 12.89                              | 0.04 |        | 1.64                                                  | 0.04 |        | 1.56 | 1.72 |
| standard                 | 55               | 14.40                                |      |        | 12.89                              | 0.04 |        | 1.52                                                  | 0.04 |        | 1.44 | 1.60 |
| modelled w.u.            | 65               | 13.64                                | 0.09 |        | 11.94                              | 0.09 | 96.45  | 1.71                                                  | 0.05 | 5.74   | 1.62 | 1.80 |
| modelled w/o u.          | 65               | 13.64                                |      |        | 11.94                              | 0.04 |        | 1.71                                                  | 0.04 |        | 1.62 | 1.79 |
| standard                 | 65               | 13.52                                |      |        | 11.94                              | 0.04 |        | 1.58                                                  | 0.04 |        | 1.50 | 1.67 |
| modelled w.u.            | 75               | 11.25                                | 0.15 |        | 9.22                               | 0.13 | 112.49 | 2.03                                                  | 0.07 | 17.76  | 1.89 | 2.17 |
| modelled w/o u.          | 75               | 11.25                                |      |        | 9.22                               | 0.06 |        | 2.03                                                  | 0.06 |        | 1.91 | 2.15 |
| standard                 | 75               | 10.89                                |      |        | 9.10                               | 0.06 |        | 1.80                                                  | 0.06 |        | 1.68 | 1.92 |
| modelled w.u.            | 85               | 6.55                                 | 0.19 |        | 5.25                               | 0.15 | 141.54 | 1.29                                                  | 0.08 | 36.83  | 1.13 | 1.46 |
| modelled w/o u.          | 85               | 6.55                                 |      |        | 5.25                               | 0.06 |        | 1.29                                                  | 0.06 |        | 1.18 | 1.41 |
| standard                 | 85               | 6.10                                 |      |        | 5.04                               | 0.06 |        | 1.05                                                  | 0.06 |        | 0.94 | 1.17 |
| <b>diagnosed in 2002</b> |                  |                                      |      |        |                                    |      |        |                                                       |      |        |      |      |
| modelled w.u.            | 55               | 14.60                                | 0.06 |        | 12.95                              | 0.07 | 65.47  | 1.65                                                  | 0.04 | 2.59   | 1.57 | 1.74 |
| modelled w/o u.          | 55               | 14.60                                |      |        | 12.95                              | 0.04 |        | 1.65                                                  | 0.04 |        | 1.57 | 1.73 |
| standard                 | 55               | 14.45                                |      |        | 12.93                              | 0.04 |        | 1.52                                                  | 0.04 |        | 1.44 | 1.60 |
| modelled w.u.            | 65               | 13.62                                | 0.10 |        | 11.92                              | 0.10 | 117.82 | 1.70                                                  | 0.05 | 7.57   | 1.61 | 1.79 |
| modelled w/o u.          | 65               | 13.62                                |      |        | 11.92                              | 0.04 |        | 1.70                                                  | 0.04 |        | 1.62 | 1.79 |
| standard                 | 65               | 13.64                                |      |        | 12.04                              | 0.04 |        | 1.60                                                  | 0.04 |        | 1.52 | 1.69 |
| modelled w.u.            | 75               | 11.00                                | 0.19 |        | 9.03                               | 0.15 | 155.74 | 1.97                                                  | 0.08 | 26.35  | 1.82 | 2.12 |
| modelled w/o u.          | 75               | 11.00                                |      |        | 9.03                               | 0.06 |        | 1.97                                                  | 0.06 |        | 1.85 | 2.08 |
| standard                 | 75               | 11.13                                |      |        | 9.28                               | 0.06 |        | 1.85                                                  | 0.06 |        | 1.73 | 1.97 |
| modelled w.u.            | 85               | 6.26                                 | 0.23 |        | 5.05                               | 0.17 | 206.36 | 1.21                                                  | 0.09 | 59.83  | 1.04 | 1.39 |
| modelled w/o u.          | 85               | 6.26                                 |      |        | 5.05                               | 0.06 |        | 1.21                                                  | 0.06 |        | 1.10 | 1.32 |
| standard                 | 85               | 6.26                                 |      |        | 5.17                               | 0.06 |        | 1.09                                                  | 0.06 |        | 0.97 | 1.21 |
