# Supplementary material for: Including uncertainty of the expected mortality rates in the prediction of loss in life expectancy
Source: Springer Nature journal article supplement (doi:10.1186/s12874-023-02118-w), 2023-12-12
Supplement: MOESM4 [file 26519438]

Table S4: Point estimates (PE) with lower (LCI) and upper (UCI) 95% confidence intervals, standard errors (SE) and relative % precision (RP) of an expected 15-year restricted mean survival time (15-year RMST<sub>exp</sub>), observed 15-year restricted mean survival time (15-year RMST<sub>C</sub>) and loss in 15-year restricted mean survival time (15-year LRMST), obtained with different approaches. Results are presented for women, aged 55, 65, 75 and 85 years at diagnosis being diagnosed with colon cancer in 1992, 1997 and 2002 years. All PEs are measured in years. RP illustrates the comparison of modelling approaches with and without uncertainty in the expected measures.

| Approach                 | Age at diagnosis | Expected 15-year RMST <sub>exp</sub> |      |        | Observed 15-year RMST <sub>C</sub> |      |        | Loss in 15-year restricted mean survival time (LRMST) |      |        |      |      |
|--------------------------|------------------|--------------------------------------|------|--------|------------------------------------|------|--------|-------------------------------------------------------|------|--------|------|------|
|                          |                  | PE                                   | SE   | RP (%) | PE                                 | SE   | RP (%) | PE                                                    | SE   | RP (%) | LCI  | UCI  |
| <b>diagnosed in 1992</b> |                  |                                      |      |        |                                    |      |        |                                                       |      |        |      |      |
| modelled w.u.            | 55               | 14.43                                | 0.11 |        | 8.66                               | 0.21 | 4.54   | 5.77                                                  | 0.20 | 3.12   | 5.38 | 6.17 |
| modelled w/o u.          | 55               | 14.43                                |      |        | 8.66                               | 0.20 |        | 5.77                                                  | 0.20 |        | 5.39 | 6.16 |
| standard                 | 55               | 14.37                                |      |        | 8.70                               | 0.20 |        | 5.68                                                  | 0.20 |        | 5.29 | 6.06 |
| modelled w.u.            | 65               | 13.57                                | 0.15 |        | 7.99                               | 0.15 | 19.39  | 5.58                                                  | 0.14 | 15.88  | 5.31 | 5.86 |
| modelled w/o u.          | 65               | 13.57                                |      |        | 7.99                               | 0.12 |        | 5.58                                                  | 0.12 |        | 5.34 | 5.82 |
| standard                 | 65               | 13.41                                |      |        | 7.94                               | 0.12 |        | 5.47                                                  | 0.12 |        | 5.23 | 5.71 |
| modelled w.u.            | 75               | 11.25                                | 0.23 |        | 6.52                               | 0.14 | 67.66  | 4.73                                                  | 0.14 | 63.01  | 4.46 | 5.01 |
| modelled w/o u.          | 75               | 11.25                                |      |        | 6.52                               | 0.09 |        | 4.73                                                  | 0.09 |        | 4.56 | 4.90 |
| standard                 | 75               | 10.62                                |      |        | 6.32                               | 0.08 |        | 4.30                                                  | 0.08 |        | 4.14 | 4.46 |
| modelled w.u.            | 85               | 6.59                                 | 0.31 |        | 3.94                               | 0.18 | 142.58 | 2.65                                                  | 0.17 | 124.12 | 2.32 | 2.97 |
| modelled w/o u.          | 85               | 6.59                                 |      |        | 3.94                               | 0.07 |        | 2.65                                                  | 0.07 |        | 2.50 | 2.79 |
| standard                 | 85               | 5.96                                 |      |        | 3.71                               | 0.07 |        | 2.26                                                  | 0.07 |        | 2.13 | 2.39 |
| modelled w.u.            | 55               | 14.53                                | 0.05 |        | 8.71                               | 0.20 | 1.04   | 5.82                                                  | 0.20 | 0.71   | 5.43 | 6.21 |
| <b>diagnosed in 1997</b> |                  |                                      |      |        |                                    |      |        |                                                       |      |        |      |      |
| modelled w/o u.          | 55               | 14.53                                |      |        | 8.71                               | 0.20 |        | 5.82                                                  | 0.20 |        | 5.43 | 6.21 |
| standard                 | 55               | 14.40                                |      |        | 8.71                               | 0.20 |        | 5.69                                                  | 0.20 |        | 5.30 | 6.07 |
| modelled w.u.            | 65               | 13.64                                | 0.09 |        | 8.03                               | 0.13 | 6.95   | 5.62                                                  | 0.13 | 5.72   | 5.36 | 5.87 |
| modelled w/o u.          | 65               | 13.64                                |      |        | 8.03                               | 0.12 |        | 5.62                                                  | 0.12 |        | 5.38 | 5.86 |
| standard                 | 65               | 13.52                                |      |        | 8.00                               | 0.12 |        | 5.52                                                  | 0.12 |        | 5.28 | 5.76 |
| modelled w.u.            | 75               | 11.25                                | 0.15 |        | 6.52                               | 0.12 | 35.52  | 4.73                                                  | 0.11 | 32.98  | 4.50 | 4.95 |
| modelled w/o u.          | 75               | 11.25                                |      |        | 6.52                               | 0.09 |        | 4.73                                                  | 0.09 |        | 4.56 | 4.90 |
| standard                 | 75               | 10.89                                |      |        | 6.47                               | 0.09 |        | 4.43                                                  | 0.09 |        | 4.26 | 4.59 |
| modelled w.u.            | 85               | 6.55                                 | 0.19 |        | 3.92                               | 0.12 | 68.66  | 2.63                                                  | 0.12 | 57.43  | 2.40 | 2.85 |
| modelled w/o u.          | 85               | 6.55                                 |      |        | 3.92                               | 0.07 |        | 2.63                                                  | 0.07 |        | 2.49 | 2.77 |
| standard                 | 85               | 6.10                                 |      |        | 3.78                               | 0.07 |        | 2.32                                                  | 0.07 |        | 2.18 | 2.45 |
| <b>diagnosed in 2002</b> |                  |                                      |      |        |                                    |      |        |                                                       |      |        |      |      |
| modelled w.u.            | 55               | 14.60                                | 0.06 |        | 8.75                               | 0.20 | 1.53   | 5.85                                                  | 0.20 | 1.06   | 5.46 | 6.24 |
| modelled w/o u.          | 55               | 14.60                                |      |        | 8.75                               | 0.20 |        | 5.85                                                  | 0.20 |        | 5.46 | 6.24 |
| standard                 | 55               | 14.45                                |      |        | 8.74                               | 0.20 |        | 5.71                                                  | 0.20 |        | 5.32 | 6.10 |
| modelled w.u.            | 65               | 13.62                                | 0.10 |        | 8.02                               | 0.13 | 8.98   | 5.60                                                  | 0.13 | 7.46   | 5.35 | 5.86 |
| modelled w/o u.          | 65               | 13.62                                |      |        | 8.02                               | 0.12 |        | 5.60                                                  | 0.12 |        | 5.36 | 5.84 |
| standard                 | 65               | 13.64                                |      |        | 8.06                               | 0.13 |        | 5.58                                                  | 0.13 |        | 5.34 | 5.82 |
| modelled w.u.            | 75               | 11.00                                | 0.19 |        | 6.39                               | 0.13 | 51.91  | 4.61                                                  | 0.12 | 47.99  | 4.36 | 4.85 |
| modelled w/o u.          | 75               | 11.00                                |      |        | 6.39                               | 0.08 |        | 4.61                                                  | 0.08 |        | 4.44 | 4.77 |
| standard                 | 75               | 11.13                                |      |        | 6.59                               | 0.09 |        | 4.54                                                  | 0.09 |        | 4.37 | 4.71 |
| modelled w.u.            | 85               | 6.26                                 | 0.23 |        | 3.77                               | 0.14 | 103.95 | 2.50                                                  | 0.13 | 88.66  | 2.24 | 2.75 |
| modelled w/o u.          | 85               | 6.26                                 |      |        | 3.77                               | 0.07 |        | 2.50                                                  | 0.07 |        | 2.36 | 2.63 |
| standard                 | 85               | 6.26                                 |      |        | 3.87                               | 0.07 |        | 2.38                                                  | 0.07 |        | 2.24 | 2.52 |
