# Supplementary material for: Including uncertainty of the expected mortality rates in the prediction of loss in life expectancy
Source: Springer Nature journal article supplement (doi:10.1186/s12874-023-02118-w), 2023-12-12
Supplement: MOESM7 [file 26519438]

## Estimation of variance of LLE

$LE_{\text{exp}}$  and  $LE_C$  are asymptotically normal random variables, so their difference LLE is also random variable with  $N(\mu; \Sigma)$ , where the expectation  $\mu = E(LLE) = E(LE_{\text{exp}}) - E(LE_C)$  and variance-covariance matrix  $\Sigma$  can be found by matrix multiplication:

$$\Sigma = G^T \cdot V \cdot G, \quad (1)$$

where

$$G = \left( \frac{\partial(LE_{\text{exp}} - LE_C)}{\partial \hat{\beta}} \right) = \begin{pmatrix} \frac{\partial(LE_{\text{exp}} - LE_C)}{\partial \hat{\beta}_{21}} \\ \frac{\partial(LE_{\text{exp}} - LE_C)}{\partial \hat{\beta}_{22}} \\ \dots \\ \frac{\partial(LE_{\text{exp}} - LE_C)}{\partial \hat{\beta}_{2p_2}} \\ - \frac{\partial LE_C}{\partial \hat{\beta}_{11}} \\ \dots \\ - \frac{\partial LE_C}{\partial \hat{\beta}_{1p_1}} \end{pmatrix}, \quad (2)$$

where  $p_1$  is the number of parameters in vector  $\beta_1$ ,  $p_2$  is the number of parameters in vector  $\beta_2$  and  $\beta$  is a vector of  $p = p_1 + p_2$  parameters:

$$\hat{\beta} = (\widehat{\beta}_2 \widehat{\beta}_1)^T = (\widehat{\beta}_{21} \widehat{\beta}_{22} \dots \widehat{\beta}_{2p_2} \widehat{\beta}_{11} \widehat{\beta}_{12} \dots \widehat{\beta}_{1p_1})^T$$

$$\begin{aligned} \frac{\partial \widehat{LE}_C}{\partial \hat{\beta}} &= - \frac{\partial \int_0^{t^*} \widehat{Cr}_{cancer}(u) du}{\partial \hat{\beta}} - \frac{\partial \int_0^{t^*} \widehat{Cr}_{other}(u) du}{\partial \hat{\beta}} \\ &= - \frac{\partial \int_0^{t^*} \widehat{R}(u) \cdot \widehat{S}^*(a_0 + u) \cdot \widehat{h}^*(a_0 + u) du}{\partial \hat{\beta}} - \frac{\partial \int_0^{t^*} \widehat{R}(u) \cdot \widehat{S}^*(a_0 + u) \cdot \widehat{\lambda}(u) du}{\partial \hat{\beta}} \end{aligned}$$

and

$$\frac{\partial \widehat{LE}_{\text{exp}}}{\partial \hat{\beta}} = \frac{\partial \int_0^{t^*} \widehat{S}^*(a_0 + u) du}{\partial \hat{\beta}} = \left( \frac{\partial \int_0^{t^*} \widehat{S}^*(a_0 + u)}{\partial \hat{\beta}_{21}} \quad \frac{\partial \int_0^{t^*} \widehat{S}^*(a_0 + u)}{\partial \hat{\beta}_{22}} \quad \dots \quad \frac{\partial \int_0^{t^*} \widehat{S}^*(a_0 + u)}{\partial \hat{\beta}_{2p_2}} \quad 0_1 \quad \dots \quad 0_{p_1} \right)$$

Variance-covariance  $p \times p$  matrix  $V$  can be presented as:

$$V = \begin{pmatrix} \sigma_{\beta_{21}}^2 & \sigma_{\beta_{21},\beta_{22}} & \cdots & \sigma_{\beta_{21},\beta_{2p_2}} & 0 & 0 & \cdots & 0 \\ \sigma_{\beta_{22},\beta_{21}} & \sigma_{\beta_{22}}^2 & \cdots & \sigma_{\beta_{22},\beta_{2p_2}} & 0 & 0 & \cdots & 0 \\ \cdots & \cdots \\ \sigma_{\beta_{2p_2},\beta_{21}} & \sigma_{\beta_{2p_2},\beta_{22}} & \cdots & \sigma_{\beta_{2p_2}}^2 & 0 & 0 & \cdots & 0 \\ 0 & 0 & \cdots & 0 & \sigma_{\beta_{11}}^2 & \sigma_{\beta_{11},\beta_{12}} & \cdots & \sigma_{\beta_{11},\beta_{1p_1}} \\ 0 & 0 & \cdots & 0 & \sigma_{\beta_{11},\beta_{12}} & \sigma_{\beta_{12}}^2 & \cdots & \sigma_{\beta_{12},\beta_{1p_1}} \\ \cdots & \cdots \\ 0 & 0 & \cdots & 0 & \sigma_{\beta_{1p_1},\beta_{11}} & \sigma_{\beta_{1p_1},\beta_{12}} & \cdots & \sigma_{\beta_{1p_1}}^2 \end{pmatrix}, \quad (3)$$

where  $V_2(\hat{\beta}_2)$  is the variance-covariance matrix from model for expected mortality:

$$V_2(\hat{\beta}_2) = \begin{pmatrix} \sigma_{\beta_{21}}^2 & \sigma_{\beta_{21},\beta_{22}} & \cdots & \sigma_{\beta_{21},\beta_{2p_2}} \\ \sigma_{\beta_{22},\beta_{21}} & \sigma_{\beta_{22}}^2 & \cdots & \sigma_{\beta_{22},\beta_{2p_2}} \\ \cdots & \cdots & \cdots & \cdots \\ \sigma_{\beta_{2p_2},\beta_{21}} & \sigma_{\beta_{2p_2},\beta_{22}} & \cdots & \sigma_{\beta_{2p_2}}^2 \end{pmatrix} \quad (4)$$

Variance-covariance matrix  $V_1(\hat{\beta}_1)$  from model for excess mortality is then:

$$V_1(\hat{\beta}_1) = \begin{pmatrix} \sigma_{\beta_{11}}^2 & \sigma_{\beta_{11},\beta_{12}} & \cdots & \sigma_{\beta_{11},\beta_{1p_1}} \\ \sigma_{\beta_{11},\beta_{12}} & \sigma_{\beta_{12}}^2 & \cdots & \sigma_{\beta_{12},\beta_{1p_1}} \\ \cdots & \cdots & \cdots & \cdots \\ \sigma_{\beta_{1p_1},\beta_{11}} & \sigma_{\beta_{1p_1},\beta_{12}} & \cdots & \sigma_{\beta_{1p_1}}^2 \end{pmatrix} \quad (5)$$
